# Supplementary figures and images for: Self-assembly of silver(i) coordination polymers with novel layered open network structures based on a flexible double betaine ligand
Source: Royal Society of Chemistry journal article supplement (doi:10.1039/b109298g), 2002-01-01

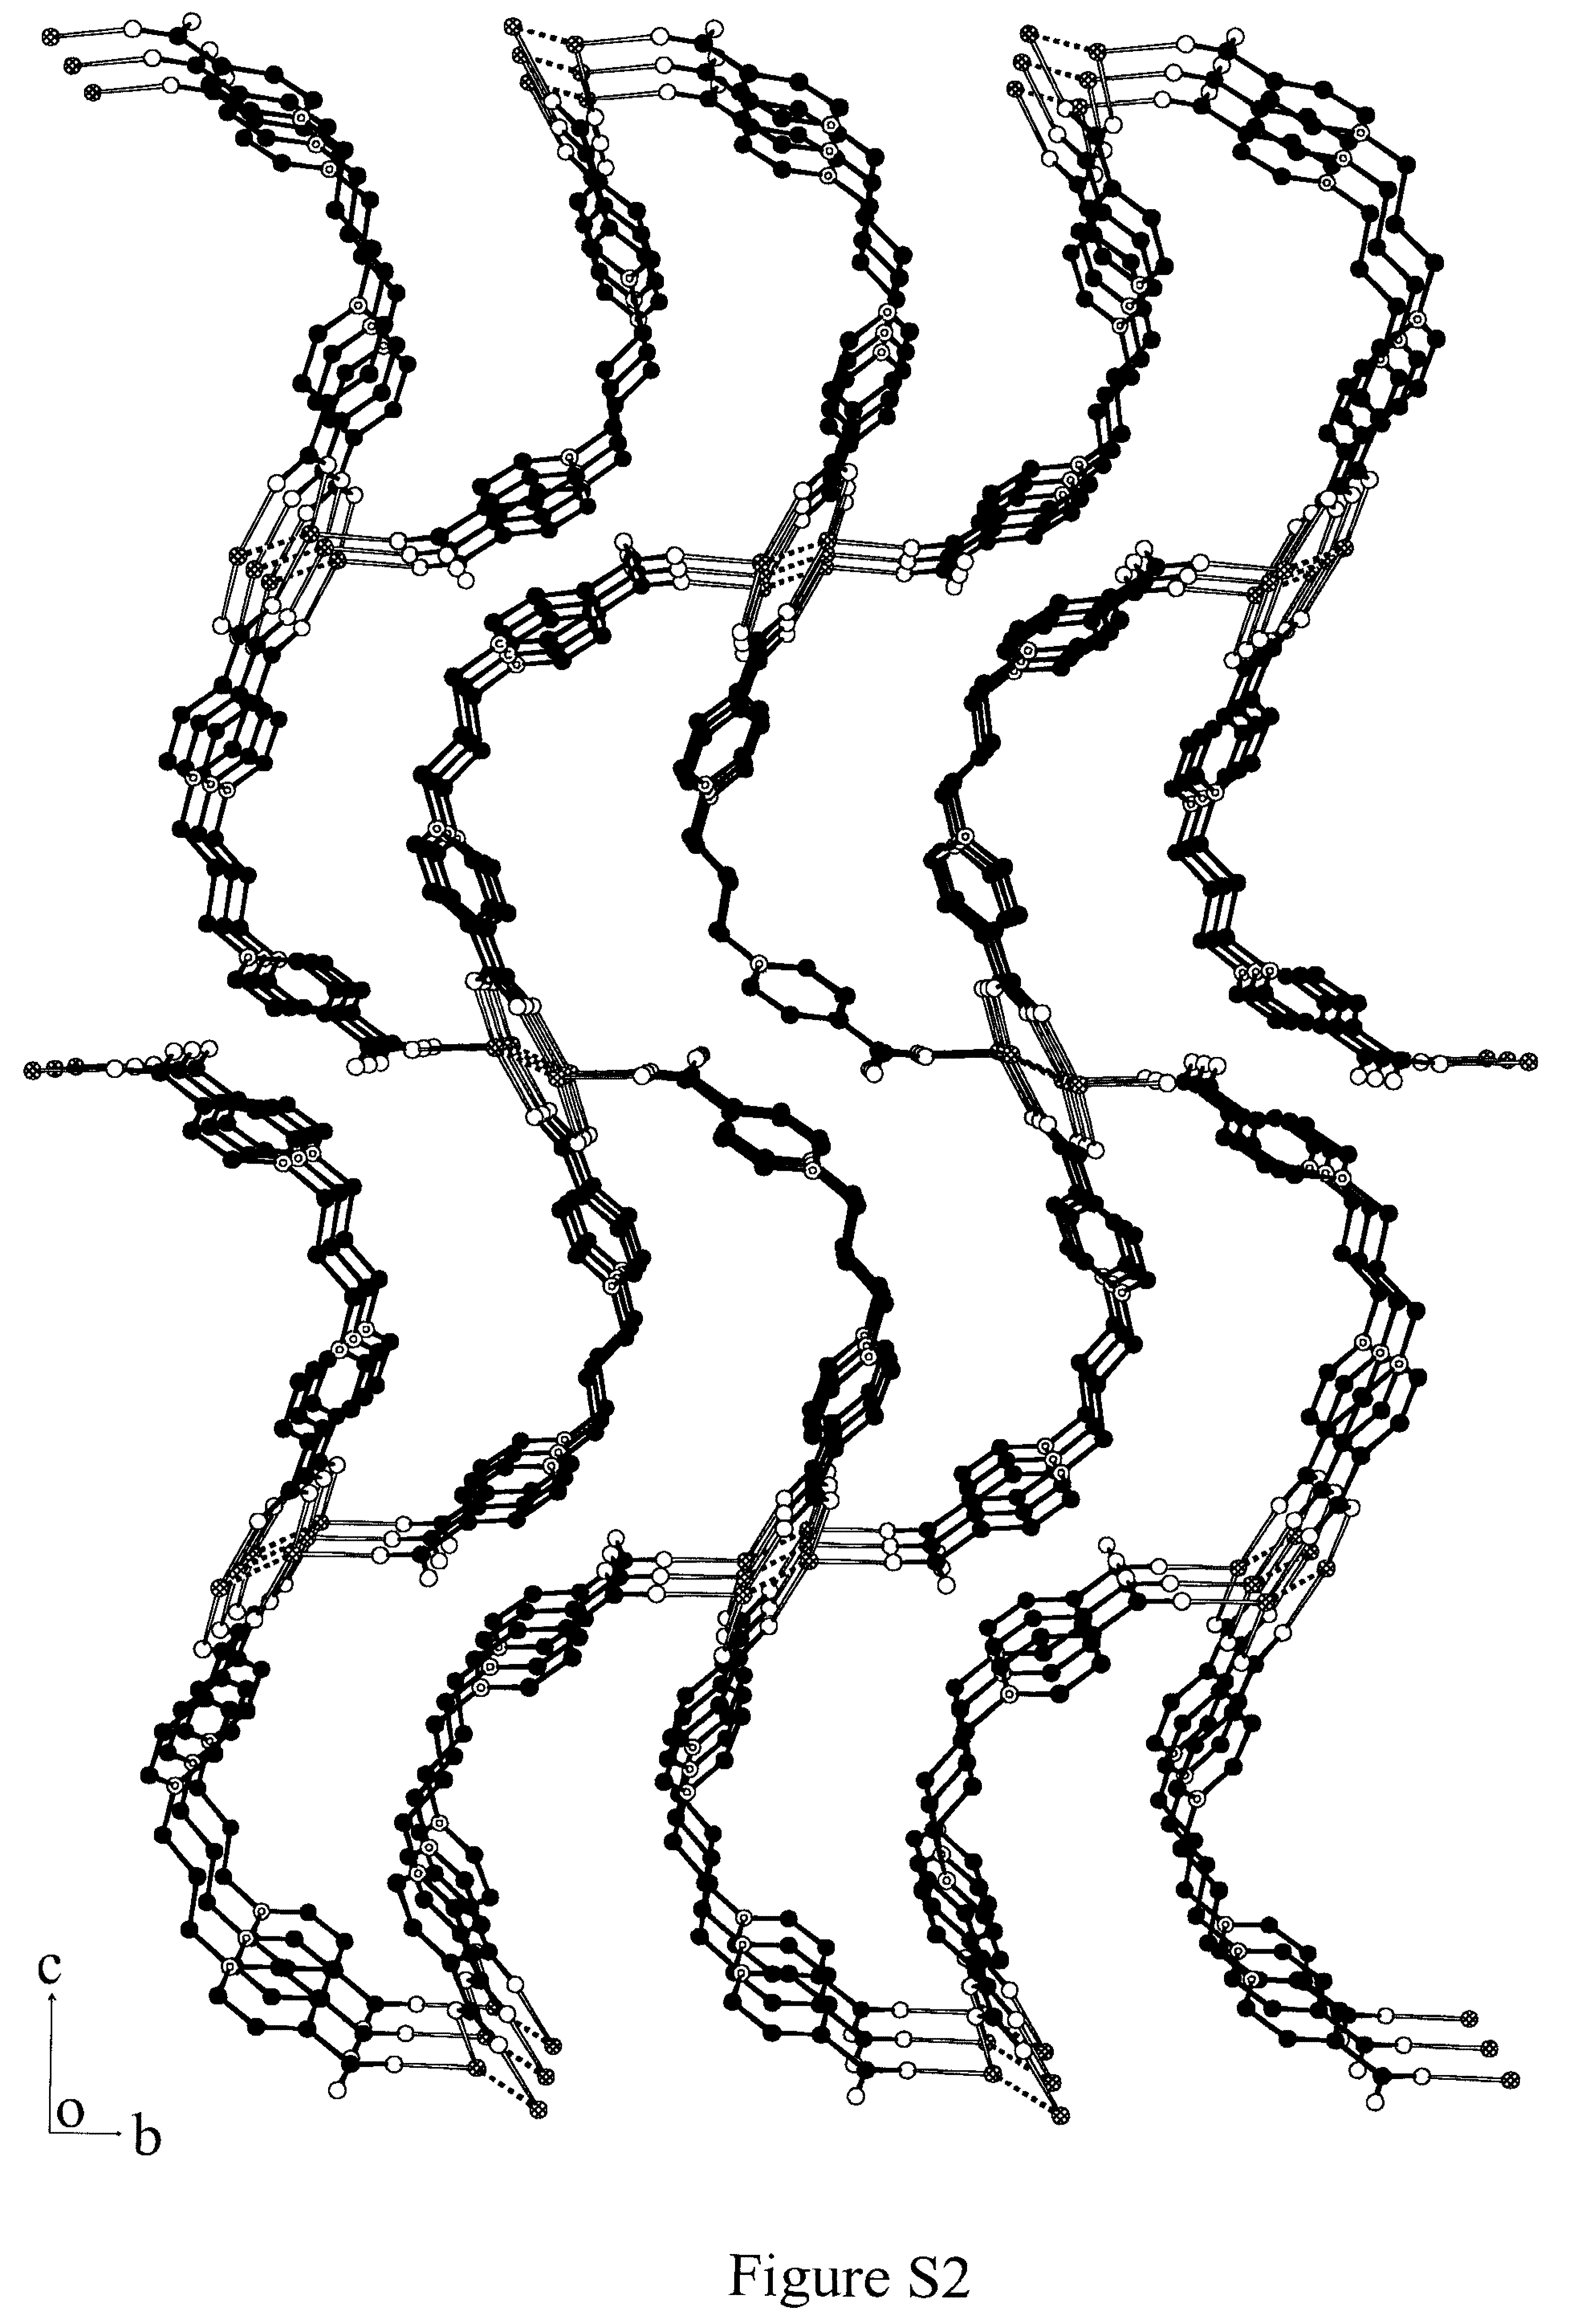

Supplement: b109298g-2.doc [file b109298g-2.doc]
